# Supplementary material for: Mesenchymal Stromal Cells from Osteoarthritic Synovium Are a Distinct Population Compared to Their Bone‐Marrow Counterparts regarding Surface Marker Distribution and Immunomodulation of Allogeneic CD4+ T‐Cell Cultures
Source: Hindawi journal article supplement (doi:10.1155/2016/6579463), 2016-01-01
Supplement: f1 [file 6579463.f1.pdf]

### Supplemental Table 1

Antibodies used for flow cytometry. AH: anti-human Ms: Mouse. ICAb: isotype control antibody.

| Surface antigen | Color        | Isotype      | Company                                     |
|-----------------|--------------|--------------|---------------------------------------------|
| CD90            | FITC         | AH Ms IgG1   | BD Biosciences, Heidelberg, Germany         |
| CD73            | PE           | AH Ms IgG1   | BD Biosciences, Heidelberg, Germany         |
| CD105           | APC          | AH Ms IgG1   | BioLegend, San Diego, USA                   |
| CD14            | FITC         | AH Ms IgG2a  | BD Biosciences, Heidelberg, Germany         |
| CD34            | PE           | AH Ms IgG1   | BD Biosciences, Heidelberg, Germany         |
| CD45            | PerCP        | AH Ms IgG2a  | Miltenyi Biotec, Bergisch Gladbach, Germany |
| HLA-ABC         | Pacific Blue | AH Ms IgG2a  | Biolegend, San Diego, USA                   |
| CD146           | PE           | AH Ms IgG1   | BD Biosciences, Heidelberg, Germany         |
| CD19            | APC          | AH Ms IgG1   | Miltenyi Biotec, Bergisch Gladbach, Germany |
| HLA-DR II       | APCCy7       | AH Ms IgG2a, | Biolegend, San Diego, USA                   |
| CD4             | FITC         | AH Ms IgG2a  | Miltenyi Biotec, Bergisch Gladbach, Germany |
| Fox P3          | PE           | AH Ms IgG1   | BD Biosciences, Heidelberg, Germany         |
| CD127           | PeCy7        | AH Ms IgG1   | BioLegend San Diego, USA                    |
| CD25            | APC          | AH Ms IgG1   | BD Biosciences, Heidelberg, Germany         |
| CD45 RO         | PE           | AH Ms IgG2a  | Biolegend San Diego, USA                    |

|                    |             |             |                                             |
|--------------------|-------------|-------------|---------------------------------------------|
| <b>CD45 RA</b>     | APCH7       | AH Ms IgG2b | BD Biosciences, Heidelberg, Germany         |
| <b>CD8</b>         | VioBlue     | AH Ms IgG2a | Miltenyi Biotec, Bergisch Gladbach, Germany |
| <b>CD14</b>        | FITC        | AH Ms IgG2a | BD Biosciences, Heidelberg, Germany         |
| <b>CD19</b>        | PE          | AH Ms IgG1  | Miltenyi Biotec, Bergisch Gladbach, Germany |
| <b>CD16</b>        | PE-Cy7      | AH Ms IgG1  | BD Biosciences, Heidelberg, Germany         |
| <b>CD56</b>        | APC         | AH Ms IgG1  | Miltenyi Biotec, Bergisch Gladbach, Germany |
| <b>CD4</b>         | APC-Cy7     | AH Ms IgG1  | BD Biosciences, Heidelberg, Germany         |
| <b>IgG1 I cAb</b>  | APC         | MS IgG1     | Miltenyi Biotec, Bergisch Gladbach, Germany |
| <b>IgG1 I cAb</b>  | APC-Cy7     | MS IgG1     | BD Biosciences, Heidelberg, Germany         |
| <b>IgG1 I cAb</b>  | FITC        | MS IgG1     | BD Biosciences, Heidelberg, Germany         |
| <b>IgG1 I cAb</b>  | PE          | MS IgG1     | BD Biosciences, Heidelberg, Germany         |
| <b>IgG1 I cAb</b>  | PE-Cy7      | MS IgG1     | BD Biosciences, Heidelberg, Germany         |
| <b>IgG2a I cAb</b> | APC-Cy7     | MS IgG2a    | BD Biosciences, Heidelberg, Germany         |
| <b>IgG2a I cAb</b> | FITC        | MS IgG2a    | BD Biosciences, Heidelberg, Germany         |
| <b>IgG2a I cAb</b> | FITC        | MS IgG2a    | Miltenyi Biotec, Bergisch Gladbach, Germany |
| <b>IgG2a I cAb</b> | PacificBlue | MS IgG2a    | BioLegend, San Diego, CA, USA               |
| <b>IgG2a I cAb</b> | PE          | MS IgG2a    | Miltenyi Biotec, Bergisch Gladbach, Germany |
| <b>IgG2a I cAb</b> | PerCP       | MS IgG2a    | Miltenyi Biotec, Bergisch Gladbach, Germany |

|                    |         |          |                                             |
|--------------------|---------|----------|---------------------------------------------|
| <b>IgG2a I cAb</b> | VioBlue | MS IgG2a | Miltenyi Biotec, Bergisch Gladbach, Germany |
| <b>IgG2b I cAb</b> | APCH7   | MS IgG2b | BD Biosciences, Heidelberg, Germany         |

## Supplemental Table 2

Mean cytokine levels in stimulated vs. unstimulated cultures at day 5.

Results are displayed as mean cytokine concentration in pg/ml  $\pm$ SD.

<TDL: Results beyond theoretical detection limit of the CBA assay.

|              | <b>CD4+</b>               | <b>CD4+/<br/>BM-MSc</b>    | <b>CD4+/<br/>SM-MSc</b>      |
|--------------|---------------------------|----------------------------|------------------------------|
|              | <b>unstimulated</b>       | <b>unstimulated</b>        | <b>unstimulated</b>          |
| IL-2         | 2.53 $\pm$<br>1.23        | 5.89 $\pm$<br>5.01         | 5.04 $\pm$ 3.36              |
| IL-4         | 1.12 $\pm$<br>0.65 (<TDL) | 0.23 $\pm$<br>0.52 (<TDL)  | 0.26 $\pm$<br>0.58(<TDL)     |
| IL-6         | 4.41 $\pm$<br>4.1         | 2644.52 $\pm$<br>2522.8    | 509.81 $\pm$<br>333.02       |
| IL-10        | 2.36 $\pm$<br>0.74 (<TDL) | 2.01 $\pm$<br>0.67 (<TDL)  | 2.49 $\pm$<br>0.73 (<TDL)    |
| IL-17a       | 3.18 $\pm$<br>3.35 (<TDL) | 0.76 $\pm$<br>1.12 (<TDL)  | 1.59 $\pm$<br>2.37 (<TDL)    |
| TNF $\alpha$ | 1.98 $\pm$<br>0.86 (<TDL) | 1.83 $\pm$<br>0.31 (<TDL)  | 1.51 $\pm$<br>0.16 (<TDL)    |
| IFN $\gamma$ | 0.73 $\pm$<br>1.05 (<TDL) | 0.22 $\pm$<br>0.48 (<TDL)  | 0.61 $\pm$<br>0.87 (<TDL)    |
| TGF $\beta$  | 183.72 $\pm$<br>73.22     | 302.73 $\pm$<br>93.55      | 241.56 $\pm$<br>80.19        |
|              | <b>CD4+</b>               | <b>CD4+/<br/>BM-MSc</b>    | <b>CD4+/<br/>BM-MSc</b>      |
|              | <b>stimulated</b>         | <b>stimulated</b>          | <b>stimulated</b>            |
| IL-2         | 8217.73 $\pm$<br>4944.97  | 1573.95 $\pm$<br>678.27    | 1863.89 $\pm$<br>659.38      |
| IL-4         | 29.19 $\pm$<br>11.38      | 20.36 $\pm$<br>5.15        | 20.8 $\pm$<br>13.41          |
| IL-6         | 131.28 $\pm$<br>67.94     | 481503.5 $\pm$<br>141513.5 | 248600.92 $\pm$<br>136045.99 |
| IL-10        | 238.84 $\pm$<br>209.37    | 270.87 $\pm$<br>207.46     | 183.86 $\pm$<br>91.79        |
| IL-17a       | 289.05 $\pm$<br>204.44    | 989.54 $\pm$<br>765.43     | 335.22 $\pm$<br>187.96       |
| TNF $\alpha$ | 475.54 $\pm$<br>300.78    | 72.03 $\pm$<br>28.17       | 71.04 $\pm$<br>30.86         |
| IFN $\gamma$ | 1780.39 $\pm$<br>1290.48  | 1054.12 $\pm$<br>866.36    | 690.62 $\pm$<br>413.63       |
| TGF $\beta$  | 194.8 $\pm$<br>57.79      | 356.68 $\pm$<br>119.12     | 271.68 $\pm$<br>60.81        |
